# Supplementary material
Source: PubMed Central journal article supplement (PMC3434805)
Supplement: supp_125.12.2837_JCS100123.pdf [file supp_125.12.2837_JCS100123.pdf]

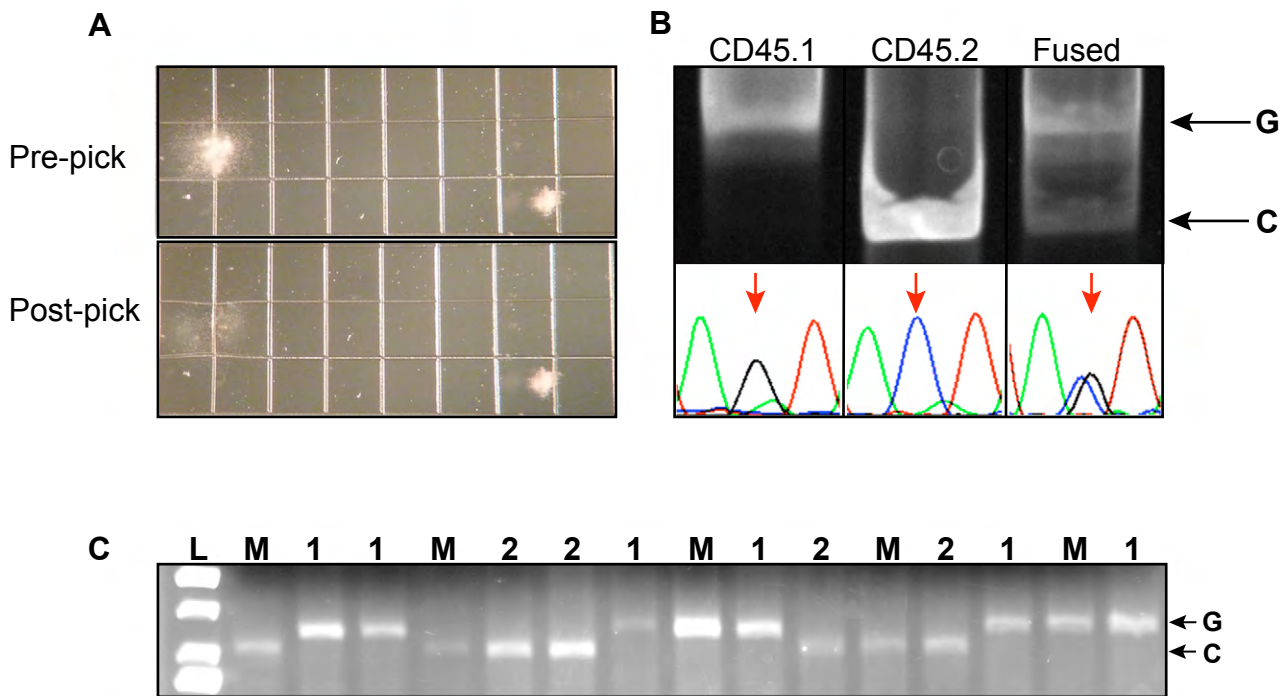

**Fig. S1. SNP PCR Strategy.** (A) Representative images of CFU-Cs under brightfield, magnified 1X under a dissecting microscope. CFUs were plated in 3 ml cytokine-containing methylcellulose on 60 mm plates. All CFUs characterized in our studies were picked under 4x or 10x magnification to ensure single colonies were isolated. Top panel: image of 2 colonies prior to isolation. Bottom panel: image of colony remnants (left) and untouched colony (right) following isolation. (B) SNP-PCR digest of control CD45.1 and CD45.2 CFUs (top) and sequence histograms (bottom) shown alongside a fused CFU. (C) Control experiment in which WBM was isolated and plated in cytokine-containing methylcellulose from a CD45.1 (1) animal, CD45.2 (2) animal, or WBM was mixed (M) at a ratio of 1:2 prior to plating in methylcellulose. Upon colony isolation, all samples were blinded. The genotypes of each colony were correctly determined following SNP-PCR digest. Each colony isolated from the “mixed” plate digested as a single genotype. There were no false positive fusion events.

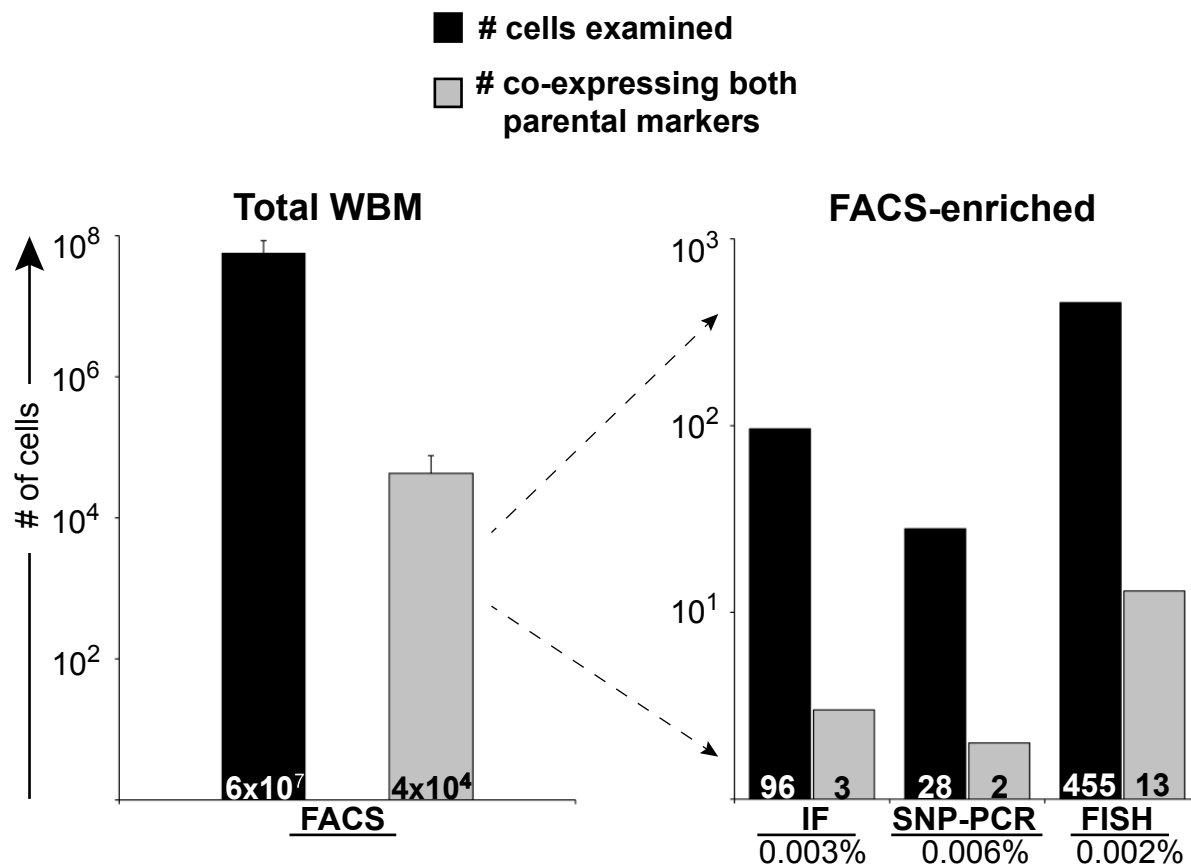

**Fig. S2.** Frequency of WBM cells co-expressing both parental markers determined by multiple methods. The average number of WBM cells co-expressing parental markers observed following transplantation is shown (left panel). Error bars represent standard deviation between mice. Enriched co-expressing cells were validated as fusion products using immunofluorescent microscopy with complementary antibodies (i.e. not used in FACS), as well as genetic screens: SNP-PCR or FISH. The number of cells analyzed as well as the number of observed fusion events is shown in each column (right panel). The overall frequency of intra-hematopoietic cell fusion in WBM of transplant animals was calculated by multiplying the average frequency determined by FACS by the frequency of validation by secondary assay (e.g. IF, SNP-PCR, FISH) and is shown below each method.

Supplemental Table 1

| <b>Single cell events analyzed by SNP-PCR</b> |                      |                            |
|-----------------------------------------------|----------------------|----------------------------|
| <b>Tissue</b>                                 | <b>G or C allele</b> | <b>G/C (fused) alleles</b> |
| <b>Transplant</b>                             |                      |                            |
| WBM                                           | 28                   | 2 (7%)                     |
| Thymus                                        | 1                    | 1 (50%)                    |
| <b>Total</b>                                  | <b>29</b>            | <b>3 (9%)</b>              |
| <b>Parabiosis</b>                             |                      |                            |
| WBM                                           | 11                   | 1 (8%)                     |
| Spleen                                        | 5                    | 1 (17%)                    |
| <b>Total</b>                                  | <b>16</b>            | <b>2 (11%)</b>             |

**Table S1.** Single cell events analyzed by SNP-PCR.

Supplemental Table 2: Complete Blood Counts on mice examined in this study

| Mouse                     | Complete Blood Count on transplant recipients |                         |                            |           |                                 |        |        |        |        |        |
|---------------------------|-----------------------------------------------|-------------------------|----------------------------|-----------|---------------------------------|--------|--------|--------|--------|--------|
|                           | Age (Mo.)                                     | Time <sup>a</sup> (Mo.) | WBC (x10 <sup>3</sup> /μL) | Hb (g/dL) | platelet (x10 <sup>3</sup> /μL) | Ne (%) | Ly (%) | Mo (%) | Eo (%) | Ba (%) |
| 1 <sup>o</sup> transplant | 18                                            | 17                      | 6.0                        | 6.6       | 1374                            | 3.3    | 69.7   | 0.1    | 0.6    | 26.3   |
| 1 <sup>o</sup> transplant | 19                                            | 17                      | 4.4                        | 7.2       | 640                             | 7.9    | 90.0   | 0.1    | 1.0    | 1.0    |
| 1 <sup>o</sup> transplant | 18                                            | 17                      | 3.4                        | 3.8       | 1200                            | 52.3   | 45.0   | 0.0    | 2.7    | 0.0    |
| 2 <sup>o</sup> transplant | 9                                             | 7                       | 7.5                        | 18.5      | 1570                            | 7.4    | 91.9   | 0.1    | 0.4    | 0.2    |
| 2 <sup>o</sup> transplant | 9                                             | 7                       | 12.0                       | 15.8      | 1078                            | 11.2   | 87.5   | 0.1    | 1.1    | 0.1    |
| 2 <sup>o</sup> parabiont  | 19                                            | 17                      | 5.0                        | 7.2       | 280                             | 3.6    | 92.3   | 0.2    | 0.1    | 3.8    |
| 2 <sup>o</sup> parabiont  | 19                                            | 17                      | 4.2                        | 5.8       | 564                             | 10.3   | 80.9   | 0.2    | 2.1    | 6.5    |
| 2 <sup>o</sup> parabiont  | 19                                            | 17                      | 5.1                        | 6.9       | 648                             | 27.4   | 72.5   | 0.0    | 0.1    | 0.0    |
| 2 <sup>o</sup> parabiont  | 19                                            | 17                      | 2.4                        | 6.6       | 1218                            | 40     | 57.9   | 0.9    | 1.2    | 0.0    |
| 2 <sup>o</sup> parabiont  | 19                                            | 17                      | 2.7                        | 7.2       | 345                             | 53.7   | 37.9   | 0.4    | 8.0    | 0.0    |
| ref. male*                | 24                                            |                         | 13.0                       | 14.0      | 3072                            | 32.0   | 50.0   | 3.4    | 2.0    | 0.3    |
| ref. female*              | 24                                            |                         | 9.2                        | 13.5      | 1562                            | 21.8   | 53.7   | 1.5    | 2.5    | 0.5    |

**a:** Indicates the number of months elapsed between time of transplant and CBC.

\* Data from Mouse Phenome Database (<http://phenome.jax.org>), 24-month animals for age comparison.

**Table S2.** Complete Blood Counts on mice examined in this study.
